# Supplementary material for: Three-Year Outcomes of 6-Month Paliperidone Palmitate in Adults With Schizophrenia: An Open-Label Extension Study of a Randomized Clinical Trial
Source: PubMed Central journal article supplement — JAMA Netw Open. 2024 Jul 17;7(7):e2421495. doi: 10.1001/jamanetworkopen.2024.21495 (PMC11255912; doi:10.1001/jamanetworkopen.2024.21495), 2024-07-17
Supplement: jamanetwopen-e2421495-s002.pdf [file jamanetwopen-e2421495-s002.pdf]

## Supplementary Online Content

Correll CU, Johnston K, Turkoz I, et al. Three-year outcomes of 6-month paliperidone palmitate in adults with schizophrenia: an open-label extension study of a randomized clinical trial. *JAMA Netw Open*. 2024;7(7):e2421495. doi:10.1001/jamanetworkopen.2024.21495

**eTable 1.** CGI-S Change From Baseline to Month 36 by Age

**eTable 2.** CGI-S Change From Baseline at Each Visit by Body Mass Index

**eTable 3.** CGI-S Change From Baseline at Each Visit by Duration of Illness

**eTable 4.** CGI-S Change From Baseline at Each Visit by Sex

**eTable 5.** PANSS Total Score Change From Baseline to Month 36 by Age

**eTable 6.** PANSS Total Score Change From Baseline at Each Visit by Body Mass Index

**eTable 7.** PANSS Total Score Change From Baseline at Each Visit by Duration of Illness

**eTable 8.** PANSS Total Score Change From Baseline at Each Visit by Sex

**eTable 9.** PSP Total Score Change From Baseline at Each Visit by Age

**eTable 10.** PSP Total Score Change From Baseline at Each Visit by Body Mass Index

**eTable 11.** PSP Total Score Change From Baseline at Each Visit by Duration of Illness

**eTable 12.** PSP Total Score Change From Baseline at Each Visit by Sex

This supplementary material has been provided by the authors to give readers additional information about their work.

**eTable 1. CGI-S Change from Baseline (DB) to Month 36 by Age<sup>a</sup>**

|                                                 | 18-25 years   | >25-50 years    | >50 years       |
|-------------------------------------------------|---------------|-----------------|-----------------|
| <b>Month 36</b>                                 |               |                 |                 |
| N                                               | 7             | 77              | 15              |
| LS-Mean (SE)                                    | -0.22 (0.140) | -0.29 (0.055)   | -0.26 (0.108)   |
| Diff of LS-Means (SE) 18-25 Years - others      |               | 0.07 (0.147)    | 0.05 (0.173)    |
| 95% CI of difference                            |               | (-0.220; 0.357) | (-0.293; 0.388) |
| <i>p</i> -value                                 |               | 0.642           | 0.784           |
| Diff of LS-Means (SE) >25-50 Years - > 50 Years |               |                 | -0.02 (0.111)   |
| 95% CI of difference                            |               |                 | (-0.239; 0.198) |
| <i>p</i> -value                                 |               |                 | 0.851           |

Abbreviations: CGI-S, Clinical Global Impression-Severity scale; DB, double-blind study; df, degrees of freedom; LS, least square; SE, standard error.

<sup>a</sup>Per Mixed Model Repeated Measures ANCOVA, change from baseline (DB) at each visit by age group. The estimate, standard error, 95% CI, and *p*-value are based on a repeated measures mixed effects ANCOVA model with baseline CGI-S Score as a fixed effect covariate; age group, country, and visit (scheduled visit assessment) as fixed effect (categorical) factors; and age group-by-visit interaction. The correlation of the repeated measures is modeled with an AR(1) covariance structure.

**eTable 2. CGI-S Change from Baseline (DB) at Each Visit by Body Mass Index<sup>a</sup>**

|                                                                                                                 | LS Mean Difference                     |                                        |                                                                       |                                                                      | df  | P-value |
|-----------------------------------------------------------------------------------------------------------------|----------------------------------------|----------------------------------------|-----------------------------------------------------------------------|----------------------------------------------------------------------|-----|---------|
|                                                                                                                 | <30 kg/m <sup>2</sup><br>Estimate (SE) | ≥30 kg/m <sup>2</sup><br>Estimate (SE) | (<30 kg/m <sup>2</sup> vs<br>≥30 kg/m <sup>2</sup> )<br>Estimate (SE) | (<30<br>kg/m <sup>2</sup> vs<br>≥30<br>kg/m <sup>2</sup> )<br>95% CI |     |         |
| <b>Model Estimates/Treatment Comparison (BMI &lt;30 kg/m<sup>2</sup> vs ≥30 kg/m<sup>2</sup>) at Each Visit</b> |                                        |                                        |                                                                       |                                                                      |     |         |
| <b>Week 4</b>                                                                                                   | -0.05 (0.054)                          | -0.04 (0.075)                          | -0.01 (0.083)                                                         | (-0.175;<br>0.151)                                                   | 302 | 0.881   |
| <b>Month 2</b>                                                                                                  | -0.06 (0.054)                          | -0.01 (0.075)                          | -0.05 (0.083)                                                         | (-0.215;<br>0.111)                                                   | 302 | 0.532   |
| <b>Month 3</b>                                                                                                  | -0.12 (0.054)                          | -0.06 (0.075)                          | -0.06 (0.083)                                                         | (-0.218;<br>0.108)                                                   | 302 | 0.506   |
| <b>Month 4</b>                                                                                                  | -0.12 (0.054)                          | -0.06 (0.075)                          | -0.06 (0.083)                                                         | (-0.218;<br>0.108)                                                   | 302 | 0.506   |
| <b>Month 5</b>                                                                                                  | -0.14 (0.054)                          | -0.09 (0.075)                          | -0.05 (0.083)                                                         | (-0.214;<br>0.112)                                                   | 302 | 0.539   |
| <b>Month 6</b>                                                                                                  | -0.14 (0.054)                          | -0.09 (0.075)                          | -0.05 (0.083)                                                         | (-0.214;<br>0.112)                                                   | 302 | 0.539   |
| <b>Month 7</b>                                                                                                  | -0.18 (0.054)                          | -0.12 (0.075)                          | -0.06 (0.083)                                                         | (-0.222;<br>0.105)                                                   | 302 | 0.481   |
| <b>Month 8</b>                                                                                                  | -0.19 (0.054)                          | -0.12 (0.075)                          | -0.07 (0.083)                                                         | (-0.233;<br>0.093)                                                   | 302 | 0.398   |
| <b>Month 9</b>                                                                                                  | -0.19 (0.054)                          | -0.15 (0.075)                          | -0.04 (0.083)                                                         | (-0.206;<br>0.121)                                                   | 302 | 0.609   |
| <b>Month 10</b>                                                                                                 | -0.21 (0.054)                          | -0.09 (0.075)                          | -0.12 (0.083)                                                         | (-0.285;<br>0.042)                                                   | 302 | 0.144   |
| <b>Month 11</b>                                                                                                 | -0.23 (0.054)                          | -0.15 (0.075)                          | -0.08 (0.083)                                                         | (-0.241;<br>0.085)                                                   | 302 | 0.349   |
| <b>Month 12</b>                                                                                                 | -0.30 (0.054)                          | -0.12 (0.075)                          | -0.18 (0.083)                                                         | (-0.339;<br>0.013)                                                   | 302 | 0.034   |
| <b>Month 15</b>                                                                                                 | -0.21 (0.054)                          | -0.12 (0.076)                          | -0.09 (0.083)                                                         | (-0.258;<br>0.069)                                                   | 306 | 0.258   |
| <b>Month 18</b>                                                                                                 | -0.24 (0.054)                          | -0.12 (0.076)                          | -0.12 (0.083)                                                         | (-0.286;<br>0.042)                                                   | 310 | 0.145   |
| <b>Month 21</b>                                                                                                 | -0.28 (0.054)                          | -0.19 (0.077)                          | -0.08 (0.084)                                                         | (-0.247;<br>0.085)                                                   | 322 | 0.336   |

|                 |               |               |               |                      |     |       |
|-----------------|---------------|---------------|---------------|----------------------|-----|-------|
| <b>Month 24</b> | -0.28 (0.054) | -0.16 (0.077) | -0.12 (0.085) | (-0.283;<br>0.051)   | 326 | 0.173 |
| <b>Month 27</b> | -0.28 (0.055) | -0.18 (0.078) | -0.10 (0.086) | (-0.272;<br>0.066)   | 338 | 0.230 |
| <b>Month 30</b> | -0.28 (0.055) | -0.21 (0.079) | -0.07 (0.087) | (-0.240;<br>0.100)   | 346 | 0.419 |
| <b>Month 33</b> | -0.32 (0.055) | -0.14 (0.080) | -0.18 (0.088) | (-0.350; -<br>0.005) | 357 | 0.043 |
| <b>Month 36</b> | -0.31 (0.056) | -0.18 (0.081) | -0.13 (0.088) | (-0.303;<br>0.045)   | 362 | 0.145 |

Abbreviations: BMI, body mass index; CGI-S, Clinical Global Impression-Severity scale; DB, double-blind study; df, degrees of freedom; SE, standard error.

<sup>a</sup>Per Mixed Model Repeated Measures ANCOVA, change from baseline (DB) at each visit by BMI group. The estimate, standard error, 95% CI, and *p*-value are based on a repeated measures mixed effects ANCOVA model with baseline CGI-S Score as a fixed effect covariate; BMI group, country, and visit (scheduled visit assessment) as fixed effect (categorical) factors; and BMI group-by-visit interaction. The correlation of the repeated measures is modeled with an AR(1) covariance structure.

**eTable 3. CGI-S Change from Baseline (DB) at Each Visit by Duration of Illness<sup>a</sup>**

|                                                                                     | LS Mean Difference        |                           |                                            |                                        | df  | P-value |
|-------------------------------------------------------------------------------------|---------------------------|---------------------------|--------------------------------------------|----------------------------------------|-----|---------|
|                                                                                     | ≤3 Years<br>Estimate (SE) | >3 Years<br>Estimate (SE) | (≤3 Years vs<br>>3 Years)<br>Estimate (SE) | (≤3 Years<br>vs >3<br>Years)<br>95% CI |     |         |
| <b>Model Estimates/Treatment Comparison (≤3 Years vs &gt;3 Years) at Each Visit</b> |                           |                           |                                            |                                        |     |         |
| <b>Week 4</b>                                                                       | -0.02 (0.071)             | -0.07 (0.058)             | 0.06 (0.083)                               | (-0.109;<br>0.219)                     | 298 | 0.509   |
| <b>Month 2</b>                                                                      | 0.01 (0.071)              | -0.08 (0.058)             | 0.09 (0.083)                               | (-0.069;<br>0.259)                     | 298 | 0.257   |
| <b>Month 3</b>                                                                      | -0.07 (0.071)             | -0.13 (0.058)             | 0.06 (0.083)                               | (-0.106;<br>0.223)                     | 298 | 0.485   |
| <b>Month 4</b>                                                                      | -0.07 (0.071)             | -0.13 (0.058)             | 0.06 (0.083)                               | (-0.106;<br>0.223)                     | 298 | 0.485   |
| <b>Month 5</b>                                                                      | -0.15 (0.071)             | -0.13 (0.058)             | -0.02 (0.083)                              | (-0.189;<br>0.139)                     | 298 | 0.765   |
| <b>Month 6</b>                                                                      | -0.15 (0.071)             | -0.13 (0.058)             | -0.02 (0.083)                              | (-0.189;<br>0.139)                     | 298 | 0.765   |
| <b>Month 7</b>                                                                      | -0.15 (0.071)             | -0.18 (0.058)             | 0.02 (0.083)                               | (-0.142;<br>0.186)                     | 298 | 0.791   |
| <b>Month 8</b>                                                                      | -0.13 (0.071)             | -0.20 (0.058)             | 0.07 (0.083)                               | (-0.091;<br>0.238)                     | 298 | 0.379   |
| <b>Month 9</b>                                                                      | -0.18 (0.071)             | -0.19 (0.058)             | 0.01 (0.083)                               | (-0.158;<br>0.170)                     | 298 | 0.942   |
| <b>Month 10</b>                                                                     | -0.15 (0.071)             | -0.20 (0.058)             | 0.05 (0.083)                               | (-0.119;<br>0.210)                     | 298 | 0.585   |
| <b>Month 11</b>                                                                     | -0.15 (0.071)             | -0.23 (0.058)             | 0.08 (0.083)                               | (-0.083;<br>0.245)                     | 298 | 0.333   |
| <b>Month 12</b>                                                                     | -0.24 (0.071)             | -0.26 (0.058)             | 0.02 (0.083)                               | (-0.143;<br>0.185)                     | 298 | 0.800   |
| <b>Month 15</b>                                                                     | -0.18 (0.071)             | -0.20 (0.058)             | 0.02 (0.084)                               | (-0.146;<br>0.183)                     | 302 | 0.825   |
| <b>Month 18</b>                                                                     | -0.12 (0.071)             | -0.25 (0.058)             | 0.12 (0.084)                               | (-0.042;<br>0.288)                     | 304 | 0.144   |
| <b>Month 21</b>                                                                     | -0.24 (0.072)             | -0.27 (0.058)             | 0.03 (0.085)                               | (-0.139;<br>0.194)                     | 314 | 0.748   |
| <b>Month 24</b>                                                                     | -0.18 (0.073)             | -0.28 (0.058)             | 0.10 (0.085)                               | (-0.066;<br>0.270)                     | 322 | 0.235   |

|                 |               |               |              |                    |     |       |
|-----------------|---------------|---------------|--------------|--------------------|-----|-------|
| <b>Month 27</b> | -0.23 (0.073) | -0.27 (0.059) | 0.04 (0.086) | (-0.126;<br>0.212) | 329 | 0.616 |
| <b>Month 30</b> | -0.23 (0.074) | -0.29 (0.059) | 0.06 (0.087) | (-0.115;<br>0.226) | 336 | 0.522 |
| <b>Month 33</b> | -0.22 (0.076) | -0.30 (0.059) | 0.09 (0.088) | (-0.089;<br>0.259) | 356 | 0.336 |
| <b>Month 36</b> | -0.26 (0.078) | -0.29 (0.059) | 0.03 (0.090) | (-0.147;<br>0.207) | 373 | 0.743 |

Abbreviations: CGI-S, Clinical Global Impression-Severity scale; DB, double-blind study; df, degrees of freedom; SE, standard error.

<sup>a</sup>Per Mixed Model Repeated Measures ANCOVA, change from baseline (DB) at each visit by duration of illness group. The estimate, standard error, 95% CI, and *p*-value are based on a repeated measures mixed effects ANCOVA model with baseline CGI-S Score as a fixed effect covariate; duration of illness, country, and visit (scheduled visit assessment) as fixed effect (categorical) factors; and duration of illness-by-visit interaction. The correlation of the repeated measures is modeled with an AR(1) covariance structure.

**eTable 4. CGI-S Change from Baseline (DB) at Each Visit by Sex<sup>a</sup>**

|                                                                           | LS Mean Difference      |                       |                                      |                               | df  | P-value |
|---------------------------------------------------------------------------|-------------------------|-----------------------|--------------------------------------|-------------------------------|-----|---------|
|                                                                           | Female<br>Estimate (SE) | Male<br>Estimate (SE) | (Female vs<br>Male)<br>Estimate (SE) | (Female vs<br>Male)<br>95% CI |     |         |
| <b>Model Estimates/Treatment Comparison (Female - Male) at Each Visit</b> |                         |                       |                                      |                               |     |         |
| <b>Week 4</b>                                                             | -0.12 (0.073)           | -0.03 (0.052)         | -0.09 (0.079)                        | (-0.249;<br>0.063)            | 316 | 0.240   |
| <b>Month 2</b>                                                            | -0.15 (0.073)           | -0.01 (0.052)         | -0.13 (0.079)                        | (-0.287;<br>0.024)            | 316 | 0.097   |
| <b>Month 3</b>                                                            | -0.15 (0.073)           | -0.10 (0.052)         | -0.05 (0.079)                        | (-0.203;<br>0.108)            | 316 | 0.551   |
| <b>Month 4</b>                                                            | -0.20 (0.073)           | -0.07 (0.052)         | -0.12 (0.079)                        | (-0.280;<br>0.032)            | 316 | 0.118   |
| <b>Month 5</b>                                                            | -0.20 (0.073)           | -0.11 (0.052)         | -0.09 (0.079)                        | (-0.244;<br>0.068)            | 316 | 0.268   |
| <b>Month 6</b>                                                            | -0.20 (0.073)           | -0.11 (0.052)         | -0.09 (0.079)                        | (-0.244;<br>0.068)            | 316 | 0.268   |
| <b>Month 7</b>                                                            | -0.28 (0.073)           | -0.12 (0.052)         | -0.15 (0.079)                        | (-0.310;<br>0.001)            | 316 | 0.051   |
| <b>Month 8</b>                                                            | -0.33 (0.073)           | -0.11 (0.052)         | -0.22 (0.079)                        | (-0.375; -<br>0.064)          | 316 | 0.006   |
| <b>Month 9</b>                                                            | -0.30 (0.073)           | -0.14 (0.052)         | -0.17 (0.079)                        | (-0.325; -<br>0.013)          | 316 | 0.034   |
| <b>Month 10</b>                                                           | -0.36 (0.073)           | -0.11 (0.052)         | -0.25 (0.079)                        | (-0.401; -<br>0.090)          | 316 | 0.002   |
| <b>Month 11</b>                                                           | -0.41 (0.073)           | -0.12 (0.052)         | -0.29 (0.079)                        | (-0.442; -<br>0.131)          | 316 | <0.001  |
| <b>Month 12</b>                                                           | -0.41 (0.073)           | -0.18 (0.052)         | -0.23 (0.079)                        | (-0.382; -<br>0.070)          | 316 | 0.005   |
| <b>Month 15</b>                                                           | -0.38 (0.073)           | -0.11 (0.052)         | -0.27 (0.079)                        | (-0.428; -<br>0.117)          | 317 | <0.001  |
| <b>Month 18</b>                                                           | -0.49 (0.073)           | -0.09 (0.052)         | -0.40 (0.080)                        | (-0.559; -<br>0.246)          | 322 | <0.001  |
| <b>Month 21</b>                                                           | -0.49 (0.074)           | -0.16 (0.052)         | -0.33 (0.080)                        | (-0.491; -<br>0.176)          | 330 | <0.001  |
| <b>Month 24</b>                                                           | -0.46 (0.074)           | -0.16 (0.053)         | -0.30 (0.081)                        | (-0.463; -<br>0.146)          | 337 | <0.001  |

|                 |               |               |               |                  |     |        |
|-----------------|---------------|---------------|---------------|------------------|-----|--------|
| <b>Month 27</b> | -0.49 (0.074) | -0.16 (0.053) | -0.34 (0.081) | (-0.498; -0.179) | 342 | <0.001 |
| <b>Month 30</b> | -0.44 (0.075) | -0.20 (0.053) | -0.24 (0.081) | (-0.398; -0.077) | 344 | 0.004  |
| <b>Month 33</b> | -0.47 (0.075) | -0.20 (0.054) | -0.27 (0.082) | (-0.435; -0.111) | 356 | 0.001  |
| <b>Month 36</b> | -0.44 (0.076) | -0.21 (0.054) | -0.23 (0.083) | (-0.392; -0.066) | 361 | 0.006  |

Abbreviations: CGI-S, Clinical Global Impression-Severity scale; DB, double-blind study; df, degrees of freedom; SE, standard error.

<sup>a</sup>Per Mixed Model Repeated Measures ANCOVA, change from baseline (DB) at each visit by sex. The estimate, standard error, 95% CI, and *p*-value are based on a repeated measures mixed effects ANCOVA model with baseline CGI-S Score as a fixed effect covariate; sex, country, and visit (scheduled visit assessment) as fixed effect (categorical) factors; and sex-by-visit interaction. The correlation of the repeated measures is modeled with an AR(1) covariance structure.



**eTable 5. PANSS Total Score Change from Baseline (DB) to Month 36 by Age<sup>a</sup>**

|                                                 | 18-25 years | >25-50 years  | >50 years     |
|-------------------------------------------------|-------------|---------------|---------------|
| <b>Month 36</b>                                 |             |               |               |
| N                                               | 8           | 78            | 15            |
| LS-Mean (SE)                                    | -2.1 (3.19) | -2.4 (1.11)   | -1.8 (2.48)   |
| Diff of LS-Means (SE) 18-25 Years - others      |             | 0.4 (3.36)    | -0.3 (4.02)   |
| 95% CI of difference                            |             | (-6.33; 7.07) | (-8.29; 7.75) |
| <i>p</i> -value                                 |             | 0.913         | 0.947         |
| Diff of LS-Means (SE) >25-50 Years - > 50 Years |             |               | -0.6 (2.68)   |
| 95% CI of difference                            |             |               | (-5.97; 4.70) |
| <i>p</i> -value                                 |             |               | 0.813         |

Abbreviations: DB, double-blind study; df, degrees of freedom; LS, least square; PANSS, Positive and Negative Syndrome Scale; SE, standard error.

<sup>a</sup>Per Mixed Model Repeated Measures ANCOVA, change from baseline (DB) at each visit by age group. The estimate, standard error, 95% CI, and *p*-value are based on a repeated measures mixed effects ANCOVA model with baseline PANSS Total Score as a fixed effect covariate; age group, country, and visit (scheduled visit assessment) as fixed effect (categorical) factors; and age group-by-visit interaction. The correlation of the repeated measures is modeled with an unstructured covariance structure.

**eTable 6. PANSS Total Score Change from Baseline (DB) at Each Visit by Body Mass Index<sup>a</sup>**

|                                                                                                                 | LS Mean Difference                     |                                        |                                                                       |                                                                      | df  | P-value |
|-----------------------------------------------------------------------------------------------------------------|----------------------------------------|----------------------------------------|-----------------------------------------------------------------------|----------------------------------------------------------------------|-----|---------|
|                                                                                                                 | <30 kg/m <sup>2</sup><br>Estimate (SE) | ≥30 kg/m <sup>2</sup><br>Estimate (SE) | (<30 kg/m <sup>2</sup> vs<br>≥30 kg/m <sup>2</sup> )<br>Estimate (SE) | (<30<br>kg/m <sup>2</sup> vs<br>≥30<br>kg/m <sup>2</sup> )<br>95% CI |     |         |
| <b>Model Estimates/Treatment Comparison (BMI &lt;30 kg/m<sup>2</sup> vs ≥30 kg/m<sup>2</sup>) at Each Visit</b> |                                        |                                        |                                                                       |                                                                      |     |         |
| <b>Month 3</b>                                                                                                  | -1.1 (0.47)                            | -1.4 (0.62)                            | 0.3 (0.65)                                                            | (-1.01;<br>1.56)                                                     | 115 | 0.678   |
| <b>Month 6</b>                                                                                                  | -2.5 (0.61)                            | -3.0 (0.86)                            | 0.5 (0.96)                                                            | (-1.42;<br>2.38)                                                     | 122 | 0.620   |
| <b>Month 9</b>                                                                                                  | -3.3 (0.61)                            | -2.5 (0.86)                            | -0.8 (0.96)                                                           | (-2.70;<br>1.10)                                                     | 124 | 0.405   |
| <b>Month 12</b>                                                                                                 | -4.2 (0.67)                            | -3.5 (0.97)                            | -0.7 (1.10)                                                           | (-2.91;<br>1.44)                                                     | 121 | 0.507   |
| <b>Month 24</b>                                                                                                 | -3.4 (1.08)                            | -0.4 (1.61)                            | -3.0 (1.89)                                                           | (-6.73;<br>0.76)                                                     | 118 | 0.118   |
| <b>Month 36</b>                                                                                                 | -3.2 (1.15)                            | -0.7 (1.74)                            | -2.6 (2.04)                                                           | (-6.63;<br>1.48)                                                     | 77  | 0.209   |

Abbreviations: BMI, body mass index; DB, double-blind study; df, degrees of freedom; PANSS, Positive and Negative Syndrome Scale; SE, standard error.

<sup>a</sup>Per Mixed Model Repeated Measures ANCOVA, change from baseline (DB) at each visit by BMI group. The estimate, standard error, 95% CI, and *p*-value are based on a repeated measures mixed effects ANCOVA model with baseline PANSS Total Score as a fixed effect covariate; BMI group, country, and visit (scheduled visit assessment) as fixed effect (categorical) factors; and BMI group-by-visit interaction. The correlation of the repeated measures is modeled with an unstructured covariance structure.

**eTable 7. PANSS Total Score Change from Baseline (DB) at Each Visit by Duration of Illness<sup>a</sup>**

|                                                                                     | LS Mean Difference        |                           |                                            |                                        | df  | P-value |
|-------------------------------------------------------------------------------------|---------------------------|---------------------------|--------------------------------------------|----------------------------------------|-----|---------|
|                                                                                     | ≤3 Years<br>Estimate (SE) | >3 Years<br>Estimate (SE) | (≤3 Years vs<br>>3 Years)<br>Estimate (SE) | (≤3 Years<br>vs >3<br>Years)<br>95% CI |     |         |
| <b>Model Estimates/Treatment Comparison (≤3 Years vs &gt;3 Years) at Each Visit</b> |                           |                           |                                            |                                        |     |         |
| <b>Month 3</b>                                                                      | -1.4 (1.11)               | -1.7 (0.90)               | 0.3 (1.30)                                 | (-2.27;<br>2.86)                       | 246 | 0.824   |
| <b>Month 6</b>                                                                      | -2.6 (1.11)               | -3.2 (0.90)               | 0.6 (1.30)                                 | (-1.97;<br>3.16)                       | 246 | 0.647   |
| <b>Month 9</b>                                                                      | -2.5 (1.11)               | -3.9 (0.90)               | 1.4 (1.30)                                 | (-1.16;<br>3.97)                       | 246 | 0.282   |
| <b>Month 12</b>                                                                     | -4.6 (1.11)               | -4.4 (0.90)               | -0.2 (1.30)                                | (-2.77;<br>2.35)                       | 246 | 0.872   |
| <b>Month 24</b>                                                                     | -3.3 (1.12)               | -2.9 (0.91)               | -0.4 (1.32)                                | (-2.99;<br>2.20)                       | 256 | 0.765   |
| <b>Month 36</b>                                                                     | -4.3 (1.19)               | -2.9 (0.93)               | -1.5 (1.39)                                | (-4.19;<br>1.27)                       | 290 | 0.294   |

Abbreviations: DB, double-blind study; df, degrees of freedom; PANSS, Positive and Negative Syndrome Scale; SE, standard error.

<sup>a</sup>Per Mixed Model Repeated Measures ANCOVA, change from baseline (DB) at each visit by duration of illness group. The estimate, standard error, 95% CI, and *p*-value are based on a repeated measures mixed effects ANCOVA model with baseline PANSS Total Score as a fixed effect covariate; duration of illness, country, and visit (scheduled visit assessment) as fixed effect (categorical) factors; and duration of illness-by-visit interaction. The correlation of the repeated measures is modeled with an AR(1) covariance structure.

**eTable 8. PANSS Total Score Change from Baseline (DB) at Each Visit by Sex<sup>a</sup>**

|                                                                           | LS Mean Difference      |                       |                                      |                               | df  | P-value |
|---------------------------------------------------------------------------|-------------------------|-----------------------|--------------------------------------|-------------------------------|-----|---------|
|                                                                           | Female<br>Estimate (SE) | Male<br>Estimate (SE) | (Female vs<br>Male)<br>Estimate (SE) | (Female vs<br>Male)<br>95% CI |     |         |
| <b>Model Estimates/Treatment Comparison (Female - Male) at Each Visit</b> |                         |                       |                                      |                               |     |         |
| <b>Month 3</b>                                                            | -1.2 (0.64)             | -1.2 (0.46)           | -0.1 (0.64)                          | (-1.34; 1.20)                 | 115 | 0.915   |
| <b>Month 6</b>                                                            | -2.9 (0.86)             | -2.5 (0.60)           | -0.5 (0.95)                          | (-2.34; 1.41)                 | 123 | 0.624   |
| <b>Month 9</b>                                                            | -4.3 (0.85)             | -2.5 (0.60)           | -1.8 (0.94)                          | (-3.61; 0.09)                 | 123 | 0.062   |
| <b>Month 12</b>                                                           | -4.7 (0.96)             | -3.7 (0.67)           | -1.0 (1.08)                          | (-3.17; 1.11)                 | 120 | 0.344   |
| <b>Month 24</b>                                                           | -2.8 (1.60)             | -2.4 (1.10)           | -0.3 (1.88)                          | (-4.06; 3.40)                 | 118 | 0.861   |
| <b>Month 36</b>                                                           | -2.8 (1.70)             | -2.3 (1.17)           | -0.5 (2.01)                          | (-4.50; 3.52)                 | 75  | 0.807   |

Abbreviations: DB, double-blind study; df, degrees of freedom; PANSS, Positive and Negative Syndrome Scale; SE, standard error.

<sup>a</sup>Per Mixed Model Repeated Measures ANCOVA, change from baseline (DB) at each visit by sex. The estimate, standard error, 95% CI, and *p*-value are based on a repeated measures mixed effects ANCOVA model with baseline PANSS Total Score as a fixed effect covariate; sex, country, and visit (scheduled visit assessment) as fixed effect (categorical) factors; and sex-by-visit interaction. The correlation of the repeated measures is modeled with an unstructured covariance structure.

**eTable 9. PSP Total Score Change from Baseline (DB) at Each Visit by Age<sup>a</sup>**

|                                                 | 18-25 years | >25-50 years  | >50 years     |
|-------------------------------------------------|-------------|---------------|---------------|
| <b>Month 36</b>                                 |             |               |               |
| N                                               | 8           | 79            | 15            |
| LS-Mean (SE)                                    | 4.5 (2.59)  | 2.9 (0.97)    | 2.6 (2.07)    |
| Diff of LS-Means (SE) 18-25 Years - others      |             | 1.6 (2.72)    | 1.9 (3.27)    |
| 95% CI of difference                            |             | (-3.84; 6.96) | (-4.60; 8.38) |
| p-value                                         |             | 0.567         | 0.564         |
| Diff of LS-Means (SE) >25-50 Years - > 50 Years |             |               | 0.3 (2.19)    |
| 95% CI of difference                            |             |               | (-4.02; 4.67) |
| p-value                                         |             |               | 0.881         |

Abbreviations: DB, double-blind study; df, degrees of freedom; LS, least square; PSP, Personal and Social Performance Scale; SE, standard error.

<sup>a</sup>Per Mixed Model Repeated Measures ANCOVA, change from baseline (DB) at each visit by age group. The estimate, standard error, 95% CI, and *p*-value are based on a repeated measures mixed effects ANCOVA model with baseline PSP Total Score as a fixed effect covariate; age group, country, and visit (scheduled visit assessment) as fixed effect (categorical) factors; and age group-by-visit interaction. The correlation of the repeated measures is modeled with an unstructured covariance structure.

**eTable 10. PSP Total Score Change from Baseline (DB) at Each Visit by Body Mass Index<sup>a</sup>**

|                                                                                                                 | LS Mean Difference                     |                                        |                                                                       |                                                                      | df  | P-value |
|-----------------------------------------------------------------------------------------------------------------|----------------------------------------|----------------------------------------|-----------------------------------------------------------------------|----------------------------------------------------------------------|-----|---------|
|                                                                                                                 | <30 kg/m <sup>2</sup><br>Estimate (SE) | ≥30 kg/m <sup>2</sup><br>Estimate (SE) | (<30 kg/m <sup>2</sup> vs<br>≥30 kg/m <sup>2</sup> )<br>Estimate (SE) | (<30<br>kg/m <sup>2</sup> vs<br>≥30<br>kg/m <sup>2</sup> )<br>95% CI |     |         |
| <b>Model Estimates/Treatment Comparison (BMI &lt;30 kg/m<sup>2</sup> vs ≥30 kg/m<sup>2</sup>) at Each Visit</b> |                                        |                                        |                                                                       |                                                                      |     |         |
| <b>Month 3</b>                                                                                                  | 0.7 (0.64)                             | 0.1 (0.85)                             | 0.6 (0.89)                                                            | (-1.13;<br>2.42)                                                     | 114 | 0.472   |
| <b>Month 6</b>                                                                                                  | 1.1 (0.73)                             | 1.1 (1.02)                             | -0.1 (1.12)                                                           | (-2.30;<br>2.13)                                                     | 116 | 0.939   |
| <b>Month 9</b>                                                                                                  | 2.5 (0.73)                             | 1.0 (1.02)                             | 1.5 (1.12)                                                            | (-0.76;<br>3.67)                                                     | 123 | 0.196   |
| <b>Month 12</b>                                                                                                 | 3.1 (0.75)                             | 1.4 (1.04)                             | 1.8 (1.14)                                                            | (-0.49;<br>4.04)                                                     | 115 | 0.123   |
| <b>Month 24</b>                                                                                                 | 3.2 (0.98)                             | 1.2 (1.43)                             | 2.0 (1.63)                                                            | (-1.28;<br>5.19)                                                     | 116 | 0.234   |
| <b>Month 36</b>                                                                                                 | 3.7 (1.00)                             | 1.7 (1.47)                             | 2.0 (1.68)                                                            | (-1.33;<br>5.34)                                                     | 97  | 0.236   |

Abbreviations: BMI, body mass index; DB, double-blind study; df, degrees of freedom; PSP, Personal and Social Performance Scale; SE, standard error.

<sup>a</sup>Per Mixed Model Repeated Measures ANCOVA, change from baseline (DB) at each visit by BMI group. The estimate, standard error, 95% CI, and *p*-value are based on a repeated measures mixed effects ANCOVA model with baseline PSP Total Score as a fixed effect covariate; BMI group, country, and visit (scheduled visit assessment) as fixed effect (categorical) factors; and BMI group-by-visit interaction. The correlation of the repeated measures is modeled with an unstructured covariance structure.

**eTable 11. PSP Total Score Change from Baseline (DB) at Each Visit by Duration of Illness<sup>a</sup>**

|                                                                                     | ≤3 Years      | >3 Years      | Difference             | Difference             | df  | P-value |
|-------------------------------------------------------------------------------------|---------------|---------------|------------------------|------------------------|-----|---------|
|                                                                                     | Estimate (SE) | Estimate (SE) | (≤3 Years vs >3 Years) | (≤3 Years vs >3 Years) |     |         |
|                                                                                     |               |               | Estimate (SE)          | 95% CI                 |     |         |
| <b>Model Estimates/Treatment Comparison (≤3 Years vs &gt;3 Years) at Each Visit</b> |               |               |                        |                        |     |         |
| <b>Month 3</b>                                                                      | 0.4 (0.78)    | 0.6 (0.70)    | -0.2 (0.90)            | (-1.97; 1.60)          | 114 | 0.838   |
| <b>Month 6</b>                                                                      | 0.5 (0.95)    | 1.4 (0.79)    | -0.9 (1.12)            | (-3.09; 1.33)          | 117 | 0.433   |
| <b>Month 9</b>                                                                      | 0.9 (0.95)    | 2.5 (0.79)    | -1.6 (1.12)            | (-3.84; 0.59)          | 123 | 0.149   |
| <b>Month 12</b>                                                                     | 2.6 (0.98)    | 2.6 (0.80)    | -0.0 (1.15)            | (-2.29; 2.27)          | 115 | 0.993   |
| <b>Month 24</b>                                                                     | 3.3 (1.40)    | 2.4 (1.02)    | 1.0 (1.65)             | (-2.28; 4.25)          | 119 | 0.552   |
| <b>Month 36</b>                                                                     | 3.8 (1.44)    | 2.8 (1.04)    | 1.0 (1.70)             | (-2.39; 4.34)          | 97  | 0.566   |

Abbreviations: DB, double-blind study; df, degrees of freedom; PSP, Personal and Social Performance Scale; SE, standard error.

<sup>a</sup>Per Mixed Model Repeated Measures ANCOVA, change from baseline (DB) at each visit by duration of illness group. The estimate, standard error, 95% CI, and *p*-value are based on a repeated measures mixed effects ANCOVA model with baseline PSP Total Score as a fixed effect covariate; duration of illness, country, and visit (scheduled visit assessment) as fixed effect (categorical) factors; and duration of illness-by-visit interaction. The correlation of the repeated measures is modeled with an unstructured covariance structure.

**eTable 12. PSP Total Score Change from Baseline (DB) at Each Visit by Sex<sup>a</sup>**

|                                                                           | LS Mean Difference      |                       |                                      |                               | df  | P-value |
|---------------------------------------------------------------------------|-------------------------|-----------------------|--------------------------------------|-------------------------------|-----|---------|
|                                                                           | Female<br>Estimate (SE) | Male<br>Estimate (SE) | (Female vs<br>Male)<br>Estimate (SE) | (Female vs<br>Male)<br>95% CI |     |         |
| <b>Model Estimates/Treatment Comparison (Female - Male) at Each Visit</b> |                         |                       |                                      |                               |     |         |
| <b>Month 3</b>                                                            | 0.6 (0.86)              | 0.5 (0.63)            | 0.2 (0.88)                           | (-1.55; 1.92)                 | 114 | 0.834   |
| <b>Month 6</b>                                                            | 0.9 (1.02)              | 1.2 (0.73)            | -0.3 (1.09)                          | (-2.47; 1.86)                 | 115 | 0.782   |
| <b>Month 9</b>                                                            | 2.5 (1.03)              | 1.8 (0.73)            | 0.7 (1.10)                           | (-1.48; 2.88)                 | 122 | 0.525   |
| <b>Month 12</b>                                                           | 2.7 (1.04)              | 2.6 (0.74)            | 0.2 (1.13)                           | (-2.08; 2.39)                 | 113 | 0.891   |
| <b>Month 24</b>                                                           | 3.4 (1.41)              | 2.3 (0.98)            | 1.1 (1.61)                           | (-2.09; 4.29)                 | 116 | 0.494   |
| <b>Month 36</b>                                                           | 3.6 (1.44)              | 2.9 (1.01)            | 0.7 (1.65)                           | (-2.60; 3.95)                 | 94  | 0.684   |

Abbreviations: df, degrees of freedom; PSP, Personal and Social Performance Scale; SE, standard error.

<sup>a</sup>Per Mixed Model Repeated Measures ANCOVA, change from baseline (DB) at each visit by sex. The estimate, standard error, 95% CI, and *p*-value are based on a repeated measures mixed effects ANCOVA model with baseline PSP Total Score as a fixed effect covariate; sex, country, and visit (scheduled visit assessment) as fixed effect (categorical) factors; and sex-by-visit interaction. The correlation of the repeated measures is modeled with an unstructured covariance structure.
