# Supplementary material for: Three-Year Outcomes of 6-Month Paliperidone Palmitate in Adults With Schizophrenia: An Open-Label Extension Study of a Randomized Clinical Trial
Source: PubMed Central journal article supplement — JAMA Netw Open. 2024 Jul 17;7(7):e2421495. doi: 10.1001/jamanetworkopen.2024.21495 (PMC11255912; doi:10.1001/jamanetworkopen.2024.21495), 2024-07-17
Supplement: jamanetwopen-e2421495-s003.pdf [file jamanetwopen-e2421495-s003.pdf]

## Data Sharing Statement

Correll. Three-Year Outcomes of 6-Month Paliperidone Palmitate in Adults With Schizophrenia. *JAMA Netw Open*. Published July 17, 2024. doi:10.1001/jamanetworkopen.2024.21495

### Data

**Data available:** Yes

**Data types:** Other (please specify)

**Additional Information:** The data sharing policy of Janssen Pharmaceutical Companies of Johnson & Johnson is available at <https://www.janssen.com/clinical-trials/transparency>. As noted on this site, requests for access to the study data can be submitted through Yale Open Data Access (YODA) Project site at <http://yoda.yale.edu>.

**How to access data:** The data sharing policy of Janssen Pharmaceutical Companies of Johnson & Johnson is available at <https://www.janssen.com/clinical-trials/transparency>. As noted on this site, requests for access to the study data can be submitted through Yale Open Data Access (YODA) Project site at <http://yoda.yale.edu>.

**When available:** With publication

### Supporting Documents

**Document types:** None

### Additional Information

**Who can access the data:** The data sharing policy of Janssen Pharmaceutical Companies of Johnson & Johnson is available at <https://www.janssen.com/clinical-trials/transparency>. As noted on this site, requests for access to the study data can be submitted through Yale Open Data Access (YODA) Project site at <http://yoda.yale.edu>.

**Types of analyses:** The data sharing policy of Janssen Pharmaceutical Companies of Johnson & Johnson is available at <https://www.janssen.com/clinical-trials/transparency>. As noted on this site, requests for access to the study data can be submitted through Yale Open Data Access (YODA) Project site at <http://yoda.yale.edu>.

**Mechanisms of data availability:** The data sharing policy of Janssen Pharmaceutical Companies of Johnson & Johnson is available at <https://www.janssen.com/clinical-trials/transparency>. As noted on this site, requests for access to the study data can be submitted through Yale Open Data Access (YODA) Project site at <http://yoda.yale.edu>.
